# Supplementary material for: Multihop range-free localization with approximate shortest path in anisotropic wireless sensor networks
Source: Springer Nature journal article supplement (doi:10.1186/1687-1499-2014-80), 2014-05-16

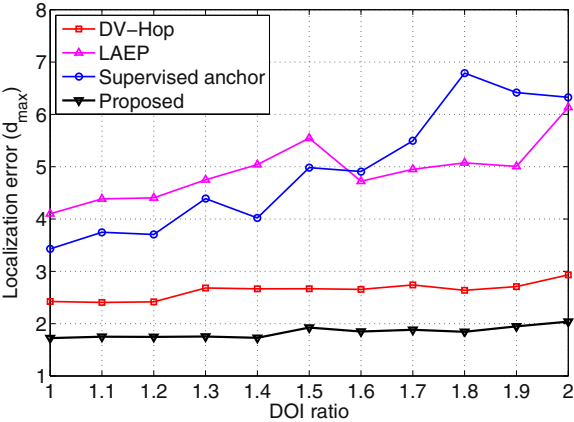

Supplement: 13638_2013_913_MOESM13_ESM.pdf [file 13638_2013_913_MOESM13_ESM.pdf]
